# Supplementary material for: Antigen Presenting Cells from Tumor and Colon of Colorectal Cancer Patients Are Distinct in Activation and Functional Status, but Comparably Responsive to Activated T Cells
Source: MDPI journal article supplement (doi:10.3390/cancers13205247), 2021-10-19
Supplement: s1 [file s1]

Supplementary Materials

Table S1. Characteristics of colorectal cancer patients.

|                          |             | Females | Males |
|--------------------------|-------------|---------|-------|
| Tumor location           | n (55)      | 23      | 32    |
|                          | Age range   | 69-88   | 37-90 |
|                          | Age median  | 77      | 73    |
|                          | Right colon | 18      | 14    |
|                          | Left colon  | 5       | 13    |
| TNM stage                | Rectum      | 0       | 5     |
|                          | I           | 4       | 7     |
|                          | II          | 9       | 11    |
|                          | III         | 9       | 13    |
|                          | IV          | 1       | 1     |
| Microsatellite stability | MSS         | 12      | 27    |
|                          | MSI-H       | 11      | 3     |
|                          | MSI-L       | 0       | 1     |
|                          | Unknown     | 0       | 1     |

**Table S2.** Fluorescence-conjugated antibodies for flow cytometry.

| <b>Antibody</b> | <b>Clone</b> | <b>Manufacturer</b> |
|-----------------|--------------|---------------------|
| CD1c            | L161         | Biolegend           |
| CD3             | UCHT1        | BD Biosciences      |
| CD4             | OKT4         | Biolegend           |
| CD8             | RPA-T8       | BD Biosciences      |
| CD11c           | B-ly6        | BD Biosciences      |
| CD14            | M5E2         | Biolegend           |
| CD15            | HI98         | BD Biosciences      |
| CD16            | 3G8          | Biolegend           |
| CD19            | SJ25C1       | BD Biosciences      |
| CD39            | A1           | Biolegend           |
| CD45            | HI30         | BD Biosciences      |
| CD56            | HCD56        | Biolegend           |
| CD64            | 10.1         | BD Biosciences      |
| CD69            | FN50         | BD Biosciences      |
| CD80            | L307.4       | BD Biosciences      |
| CD86            | FUN-1        | BD Biosciences      |
| CD103           | Ber-ACT8     | BD Biosciences      |
| CD141           | 1A4          | BD Biosciences      |
| HLA-DR          | G46-6        | BD Biosciences      |
| PD-1            | EH12.1       | BD Biosciences      |
| PDL-1           | 29E.2A3      | Biolegend           |

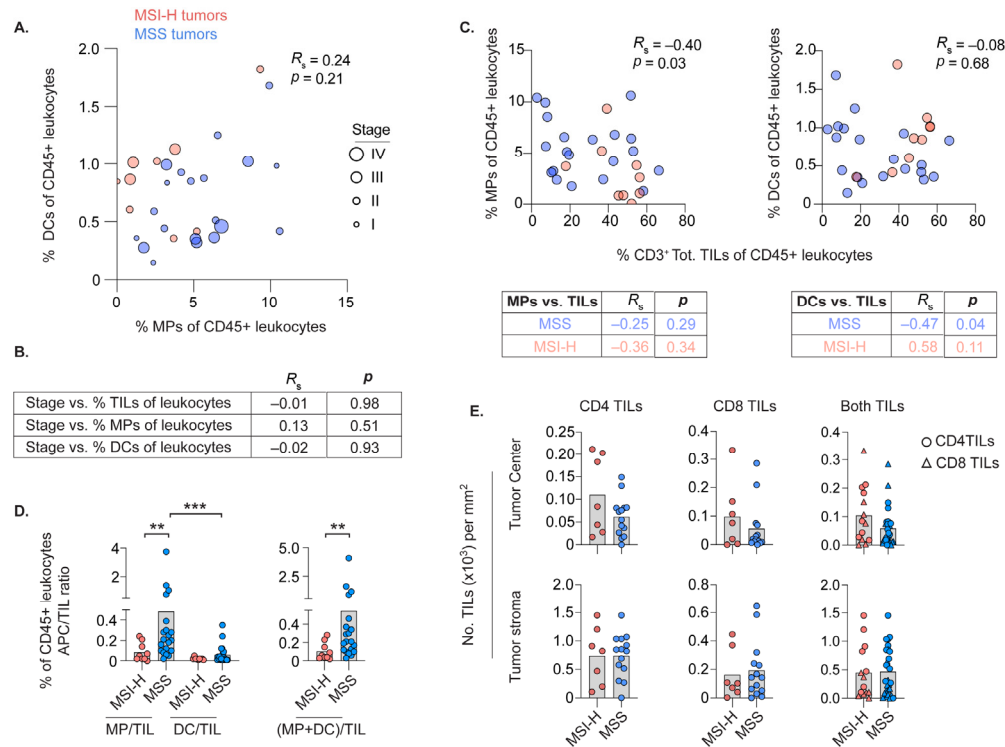

**Figure S1.** Associations of APCs and TILs according to tumor stage and MSI status. **(A)** Bubble plot with Spearman correlation analysis of the percentages of intratumoral CD64+ MPs vs. CD64- DCs within viable CD45+ leukocytes. Each circle represents an individual patient with CRC. The size and color of the circles correspond to specific tumor stage and MSI status, respectively. **(B)** Table with Spearman  $R_s$  values and p-values from association analyses of tumor stage vs. frequencies of TILs, MPs and DCs, respectively. **(C)** Spearman correlation analysis of the percentages of CD3+ TILs vs. MPs or DCs within leukocytes isolated from MSS (blue) and MSI (red) tumors. Tables below show the Spearman  $R_s$  values and corresponding p-values for analysis on either MSS or MSI-H tumors alone. **(D)** Ratio of indicated APC subset to TILs according to their respective percentages among leukocytes in MSS and MSI-H tumor suspensions. **(E)** Number of indicated TILs per mm<sup>2</sup> in the tumor center and stroma of MSI-H and MSS tumor sections. Bars show the mean. (\*\* $p < 0.01$ , \*\*\* $p < 0.001$ , Mann-Whitney test).

**A.** **CD69 on CD4<sup>+</sup>**

| CD80                                                                           | Tumor | CD69 on CD4 <sup>+</sup> |                   |                    |                   | CD80                                                                            | Colon | CD69 on CD4 <sup>+</sup> |                   |                    |                   |
|--------------------------------------------------------------------------------|-------|--------------------------|-------------------|--------------------|-------------------|---------------------------------------------------------------------------------|-------|--------------------------|-------------------|--------------------|-------------------|
|                                                                                |       | CD103 <sup>+</sup>       |                   | CD103 <sup>-</sup> |                   |                                                                                 |       | CD103 <sup>+</sup>       |                   | CD103 <sup>-</sup> |                   |
|                                                                                |       | CD39 <sup>-</sup>        | CD39 <sup>+</sup> | CD39 <sup>-</sup>  | CD39 <sup>+</sup> |                                                                                 |       | CD39 <sup>-</sup>        | CD39 <sup>+</sup> | CD39 <sup>-</sup>  | CD39 <sup>+</sup> |
| CD14 <sup>+</sup> MP                                                           |       | -0.24                    | -0.01             | -0.37              | -0.39             | CD14 <sup>+</sup> MP                                                            |       | -0.12                    | 0.02              | -0.33              | -0.22             |
|                                                                                | CDC1  | -0.65                    | -0.64             | -0.68              | -0.53             |                                                                                 | CDC1  | -0.53                    | -0.41             | -0.82              | -0.73             |
|                                                                                | CDC2  | -0.39                    | -0.33             | -0.48              | -0.23             |                                                                                 | CDC2  | -0.38                    | -0.40             | -0.38              | -0.40             |
| Spearman Rs                                                                    |       |                          |                   |                    |                   | Spearman Rs                                                                     |       |                          |                   |                    |                   |
| <div><div>0.51</div><div>0.99</div><div>0.30</div><div>0.26</div></div>        |       |                          |                   |                    |                   | <div><div>0.76</div><div>0.97</div><div>0.35</div><div>0.54</div></div>         |       |                          |                   |                    |                   |
| <div><div>0.05</div><div>0.06</div><div><b>0.04</b></div><div>0.12</div></div> |       |                          |                   |                    |                   | <div><div>0.12</div><div>0.24</div><div><b>-0.01</b></div><div>0.02</div></div> |       |                          |                   |                    |                   |
| <div><div>0.27</div><div>0.35</div><div>0.17</div><div>0.53</div></div>        |       |                          |                   |                    |                   | <div><div>0.28</div><div>0.26</div><div>0.28</div><div>0.26</div></div>         |       |                          |                   |                    |                   |
| p-value                                                                        |       |                          |                   |                    |                   | p-value                                                                         |       |                          |                   |                    |                   |

**B.** **CD69 on CD8<sup>+</sup>**

| CD80                                                                                           | Tumor | CD69 on CD8 <sup>+</sup> |                   |                    |                   | CD80                                                                                   | Colon | CD69 on CD8 <sup>+</sup> |                   |                    |                   |
|------------------------------------------------------------------------------------------------|-------|--------------------------|-------------------|--------------------|-------------------|----------------------------------------------------------------------------------------|-------|--------------------------|-------------------|--------------------|-------------------|
|                                                                                                |       | CD103 <sup>+</sup>       |                   | CD103 <sup>-</sup> |                   |                                                                                        |       | CD103 <sup>+</sup>       |                   | CD103 <sup>-</sup> |                   |
|                                                                                                |       | CD39 <sup>-</sup>        | CD39 <sup>+</sup> | CD39 <sup>-</sup>  | CD39 <sup>+</sup> |                                                                                        |       | CD39 <sup>-</sup>        | CD39 <sup>+</sup> | CD39 <sup>-</sup>  | CD39 <sup>+</sup> |
| CD14 <sup>+</sup> MP                                                                           |       | -0.14                    | 0.18              | -0.04              | 0.03              | CD14 <sup>+</sup> MP                                                                   |       | -0.18                    | 0.07              | -0.26              | -0.28             |
|                                                                                                | CDC1  | -0.83                    | -0.79             | -0.66              | -0.32             |                                                                                        | CDC1  | -0.59                    | -0.29             | -0.81              | -0.73             |
|                                                                                                | CDC2  | -0.55                    | -0.53             | -0.46              | -0.19             |                                                                                        | CDC2  | -0.07                    | -0.34             | -0.02              | -0.57             |
| Spearman Rs                                                                                    |       |                          |                   |                    |                   | Spearman Rs                                                                            |       |                          |                   |                    |                   |
| <div><div>0.71</div><div>0.63</div><div>0.92</div><div>0.95</div></div>                        |       |                          |                   |                    |                   | <div><div>0.63</div><div>0.86</div><div>0.46</div><div>0.42</div></div>                |       |                          |                   |                    |                   |
| <div><div><b>-0.01</b></div><div><b>-0.01</b></div><div><b>0.04</b></div><div>0.37</div></div> |       |                          |                   |                    |                   | <div><div>0.08</div><div>0.42</div><div><b>-0.01</b></div><div><b>0.02</b></div></div> |       |                          |                   |                    |                   |
| <div><div>0.10</div><div>0.12</div><div>0.18</div><div>0.60</div></div>                        |       |                          |                   |                    |                   | <div><div>0.87</div><div>0.34</div><div>0.96</div><div>0.09</div></div>                |       |                          |                   |                    |                   |
| p-value                                                                                        |       |                          |                   |                    |                   | p-value                                                                                |       |                          |                   |                    |                   |

**C.** **PD-1 on CD4<sup>+</sup>**

| PD-L1                                                                           | Tumor | PD-1 on CD4 <sup>+</sup> |                   |                    |                   | PD-L1                                                                                                 | Colon | PD-1 on CD4 <sup>+</sup> |                   |                    |                   |
|---------------------------------------------------------------------------------|-------|--------------------------|-------------------|--------------------|-------------------|-------------------------------------------------------------------------------------------------------|-------|--------------------------|-------------------|--------------------|-------------------|
|                                                                                 |       | CD103 <sup>+</sup>       |                   | CD103 <sup>-</sup> |                   |                                                                                                       |       | CD103 <sup>+</sup>       |                   | CD103 <sup>-</sup> |                   |
|                                                                                 |       | CD39 <sup>-</sup>        | CD39 <sup>+</sup> | CD39 <sup>-</sup>  | CD39 <sup>+</sup> |                                                                                                       |       | CD39 <sup>-</sup>        | CD39 <sup>+</sup> | CD39 <sup>-</sup>  | CD39 <sup>+</sup> |
| CD14 <sup>+</sup> MP                                                            |       | 0.44                     | 0.43              | 0.05               | 0.35              | CD14 <sup>+</sup> MP                                                                                  |       | -0.37                    | -0.10             | -0.62              | -0.29             |
|                                                                                 | CDC1  | -0.12                    | -0.05             | -0.64              | -0.15             |                                                                                                       | CDC1  | -0.83                    | -0.67             | -0.71              | -0.88             |
|                                                                                 | CDC2  | 0.41                     | 0.81              | -0.01              | 0.41              |                                                                                                       | CDC2  | -0.24                    | -0.41             | -0.30              | -0.51             |
| Spearman Rs                                                                     |       |                          |                   |                    |                   | Spearman Rs                                                                                           |       |                          |                   |                    |                   |
| <div><div>0.20</div><div>0.21</div><div>0.89</div><div>0.33</div></div>         |       |                          |                   |                    |                   | <div><div>0.30</div><div>0.79</div><div>0.06</div><div>0.42</div></div>                               |       |                          |                   |                    |                   |
| <div><div>0.76</div><div>0.89</div><div>0.05</div><div>0.68</div></div>         |       |                          |                   |                    |                   | <div><div><b>-0.01</b></div><div><b>0.04</b></div><div><b>0.03</b></div><div><b>-0.01</b></div></div> |       |                          |                   |                    |                   |
| <div><div>0.25</div><div><b>-0.01</b></div><div>0.99</div><div>0.25</div></div> |       |                          |                   |                    |                   | <div><div>0.51</div><div>0.23</div><div>0.39</div><div>0.14</div></div>                               |       |                          |                   |                    |                   |
| p-value                                                                         |       |                          |                   |                    |                   | p-value                                                                                               |       |                          |                   |                    |                   |

**D.** **PD-1 on CD8<sup>+</sup>**

| PD-L1                                                                   | Tumor | PD-1 on CD8 <sup>+</sup> |                   |                    |                   | PD-L1                                                                           | Colon | PD-1 on CD8 <sup>+</sup> |                   |                    |                   |
|-------------------------------------------------------------------------|-------|--------------------------|-------------------|--------------------|-------------------|---------------------------------------------------------------------------------|-------|--------------------------|-------------------|--------------------|-------------------|
|                                                                         |       | CD103 <sup>+</sup>       |                   | CD103 <sup>-</sup> |                   |                                                                                 |       | CD103 <sup>+</sup>       |                   | CD103 <sup>-</sup> |                   |
|                                                                         |       | CD39 <sup>-</sup>        | CD39 <sup>+</sup> | CD39 <sup>-</sup>  | CD39 <sup>+</sup> |                                                                                 |       | CD39 <sup>-</sup>        | CD39 <sup>+</sup> | CD39 <sup>-</sup>  | CD39 <sup>+</sup> |
| CD14 <sup>+</sup> MP                                                    |       | 0.18                     | 0.33              | 0.27               | 0.27              | CD14 <sup>+</sup> MP                                                            |       | -0.47                    | -0.81             | -0.55              | -0.55             |
|                                                                         | CDC1  | -0.30                    | -0.33             | -0.60              | -0.37             |                                                                                 | CDC1  | -0.59                    | -0.51             | -0.56              | -0.55             |
|                                                                         | CDC2  | 0.25                     | 0.65              | 0.12               | 0.22              |                                                                                 | CDC2  | -0.55                    | -0.40             | -0.37              | -0.34             |
| Spearman Rs                                                             |       |                          |                   |                    |                   | Spearman Rs                                                                     |       |                          |                   |                    |                   |
| <div><div>0.63</div><div>0.35</div><div>0.45</div><div>0.45</div></div> |       |                          |                   |                    |                   | <div><div>0.17</div><div><b>-0.01</b></div><div>0.11</div><div>0.11</div></div> |       |                          |                   |                    |                   |
| <div><div>0.41</div><div>0.35</div><div>0.07</div><div>0.30</div></div> |       |                          |                   |                    |                   | <div><div>0.08</div><div>0.14</div><div>0.10</div><div>0.11</div></div>         |       |                          |                   |                    |                   |
| <div><div>0.49</div><div>0.05</div><div>0.75</div><div>0.54</div></div> |       |                          |                   |                    |                   | <div><div>0.10</div><div>0.26</div><div>0.29</div><div>0.34</div></div>         |       |                          |                   |                    |                   |
| p-value                                                                 |       |                          |                   |                    |                   | p-value                                                                         |       |                          |                   |                    |                   |

**Figure S2.** Spearman correlation coefficients and p-values from association analyses of APC and T cell subsets. Spearman correlation between CD80 MFI of APC subsets vs. CD69 MFI of CD4 (A), or CD8 (B) T cell subsets in tumor and adjacent colon. Similar analyses on PD-L1 MFI of APC subsets vs. PD-1 MFI on CD4+ (C), or CD8+ (D) T cell subsets in tumor and colon. Top matrixes show Spearman correlation coefficient Rs values and grey matrixes indicate the corresponding p-values. ( $p < 0.05$  and  $p < 0.01$  are indicated in bold).
